# Supplementary material
Source: publisher site journal article supplement (https://www.spandidos-publications.com/4936/downloadSupplementary)

Figure S1. Identification of mice model. (A) The expression of Cpt1a in lung tissues of mice was detected by western blotting. (B) The mRNA level of Cpt1a in lung tissues of mice was detected by reverse transcription-quantitative PCR. n=6 per group. \*\*P<0.01 vs. Control; ##P<0.01 vs. pGLVU/GFP-shRNA control; &&P<0.01 vs. pGLVU/GFP control. Cpt1a, carnitine palmitoyl-transferase 1A; COPD, chronic obstructive pulmonary disease.

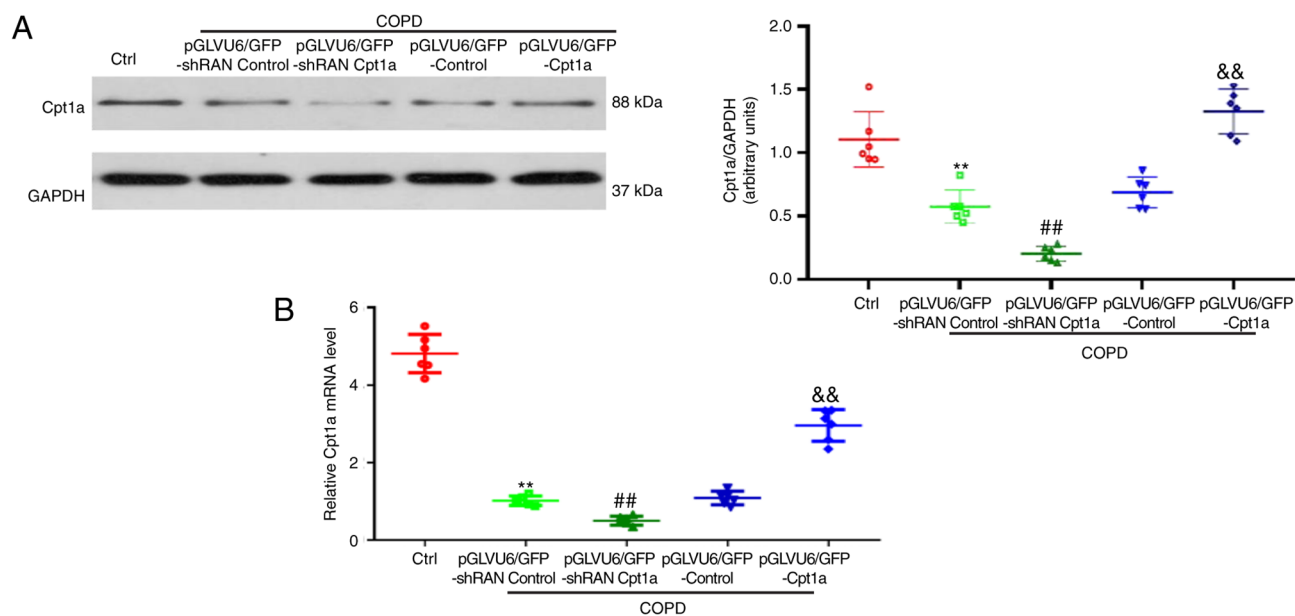

Figure S2. Typical standard curve for inflammatory factors, mouse ELISA. Typical standard curve for (A) TGF- $\beta$ , (B) IL-6, (C) TNF- $\alpha$  and (D) IL-1 $\beta$ . OD, optical density.

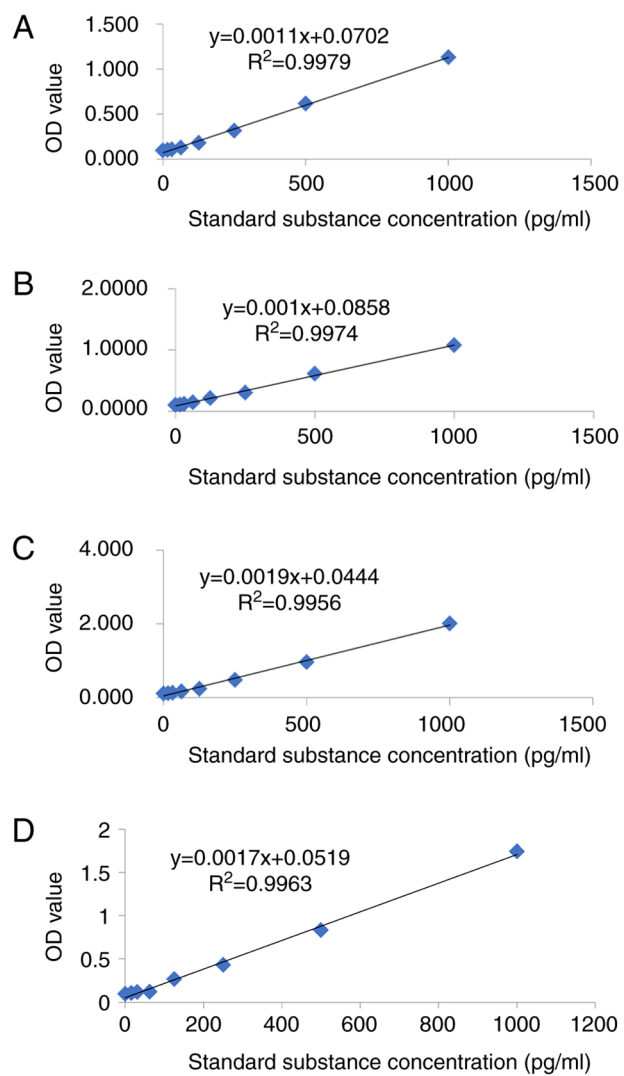

Supplement: Supplementary file 1 [file downloadSupplementary]
